# Supplementary material for: Gene drive escape from resistance depends on mechanism and ecology
Source: PubMed Central journal article supplement (PMC9108321; doi:10.1111/eva.13358), 2022-03-22
Supplement: EVA-15-721-s001.pdf [file EVA-15-721-s001.pdf]

## Appendix: Impact of Inbreeding on a Homing Gene Drive with Deleterious Fitness Effects

In this appendix, we analyze how inbreeding affects a 2-sex homing gene drive with recessive deleterious effects on fitness.

Let  $P_{AA}$ ,  $P_{Aa}$ ,  $P_{aa}$  be the frequencies of the drive locus genotypes at the start of a generation. The frequencies of the drive  $A$  and wildtype  $a$  alleles are, respectively  $p = P_{AA} + P_{Aa}/2$  and  $q = 1 - p$ . The inbreeding coefficient is  $f$ .

### Selection

The fitness of  $AA$  is  $1 - s$ . After selection, genotype frequencies change to  $P_{AA}^* = P_{AA}(1 - s)/\bar{w}$ ,  $P_{Aa}^* = P_{Aa}/\bar{w}$ , and  $P_{aa}^* = P_{aa}/\bar{w}$  where

$$\begin{aligned}\bar{w} &= P_{AA} \cdot (1 - s) + P_{Aa} \cdot 1 + P_{aa} \cdot 1 \\ &= 1 - sP_{AA} \\ &= 1 - sp(p + fq).\end{aligned}$$

The drive allele response to selection is thus

$$\begin{aligned}\Delta^{\text{sel}}p &= p^* - p \\ &= P_{AA}^* + \frac{1}{2}P_{Aa}^* - p \\ &= \frac{-sP_{AA} \cdot q}{\bar{w}} \\ &= \frac{-spq(p + fq)}{1 - sp(p + fq)}\end{aligned}$$

### Segregation distortion

The advantage gained by the drive via segregation distortion with distortion parameter  $\delta$  is

$$\begin{aligned}\Delta^{\text{sd}}p &= \delta P_{Aa}^* \\ &= \frac{\delta P_{Aa}}{\bar{w}} \\ &= \frac{\delta 2pq(1 - f)}{1 - sp(p + fq)}.\end{aligned}$$

### Equilibria

At equilibrium, the change from selection must offset that from segregation distortion, that is,  $|\Delta^{\text{sel}}p| = |\Delta^{\text{sd}}p|$ . Solving this condition for  $p$  gives the

equilibrium drive allele frequency as a function of  $\delta$ , the segregation distortion parameter,  $s$ , the selection coefficient against drive homozygotes, and  $f$  the inbreeding level:

$$\hat{p} = \frac{2\delta}{s} - \frac{f}{1-f}.$$

In the main text, when the  $Q$  allele is fixed, the inbreeding coefficient is equivalent to  $f = m$  and the corresponding drive equilibrium is

$$\hat{p} = \frac{2\delta}{s} - \frac{m}{1-m}.$$

With complete distortion ( $\delta = 1/2$ ), this expression simplifies further to

$$\hat{p} = \frac{1}{s} - \frac{m}{1-m}.$$

These equilibria are biologically feasible if and only if  $0 \leq \hat{p} \leq 1$ .
